# Supplementary material
Source: ML conference proceedings conference paper supplement (https://proceedings.neurips.cc/paper_files/paper/2019/hash/471c75ee6643a10934502bdafee198fb-Abstract.html)
Supplement: Supplementary file [file 471c75ee6643a10934502bdafee198fb-Supplemental.zip]

## Examples of Real User Queries

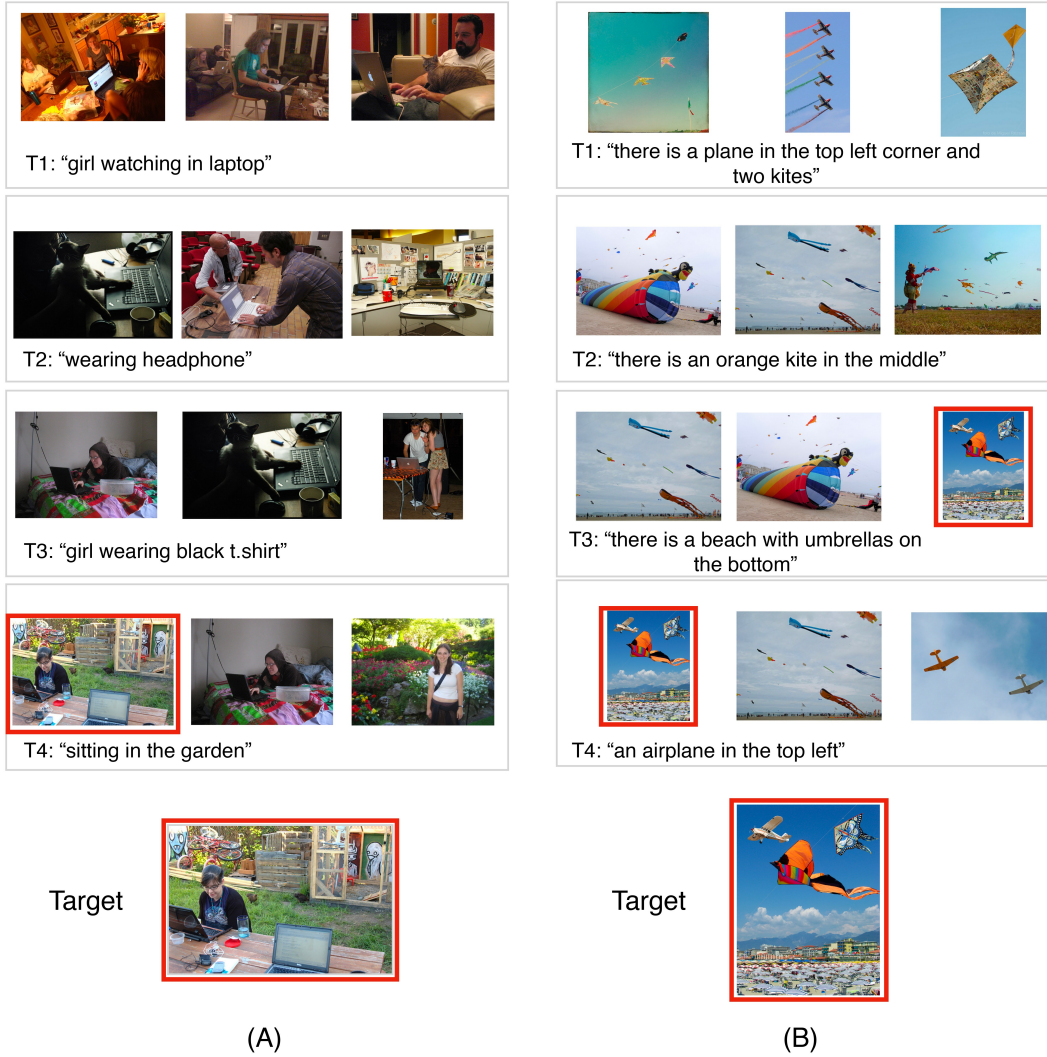

Figure 1: Examples of real user queries collected in the human subject study and the top-3 retrieved images from the Drill-down<sub>3×256</sub> model at each turn. The ranks of the target image (A) at each turn are 121, 32, 14, 1. The ranks of the target image (B) at each turn are 42, 9, 3, 1

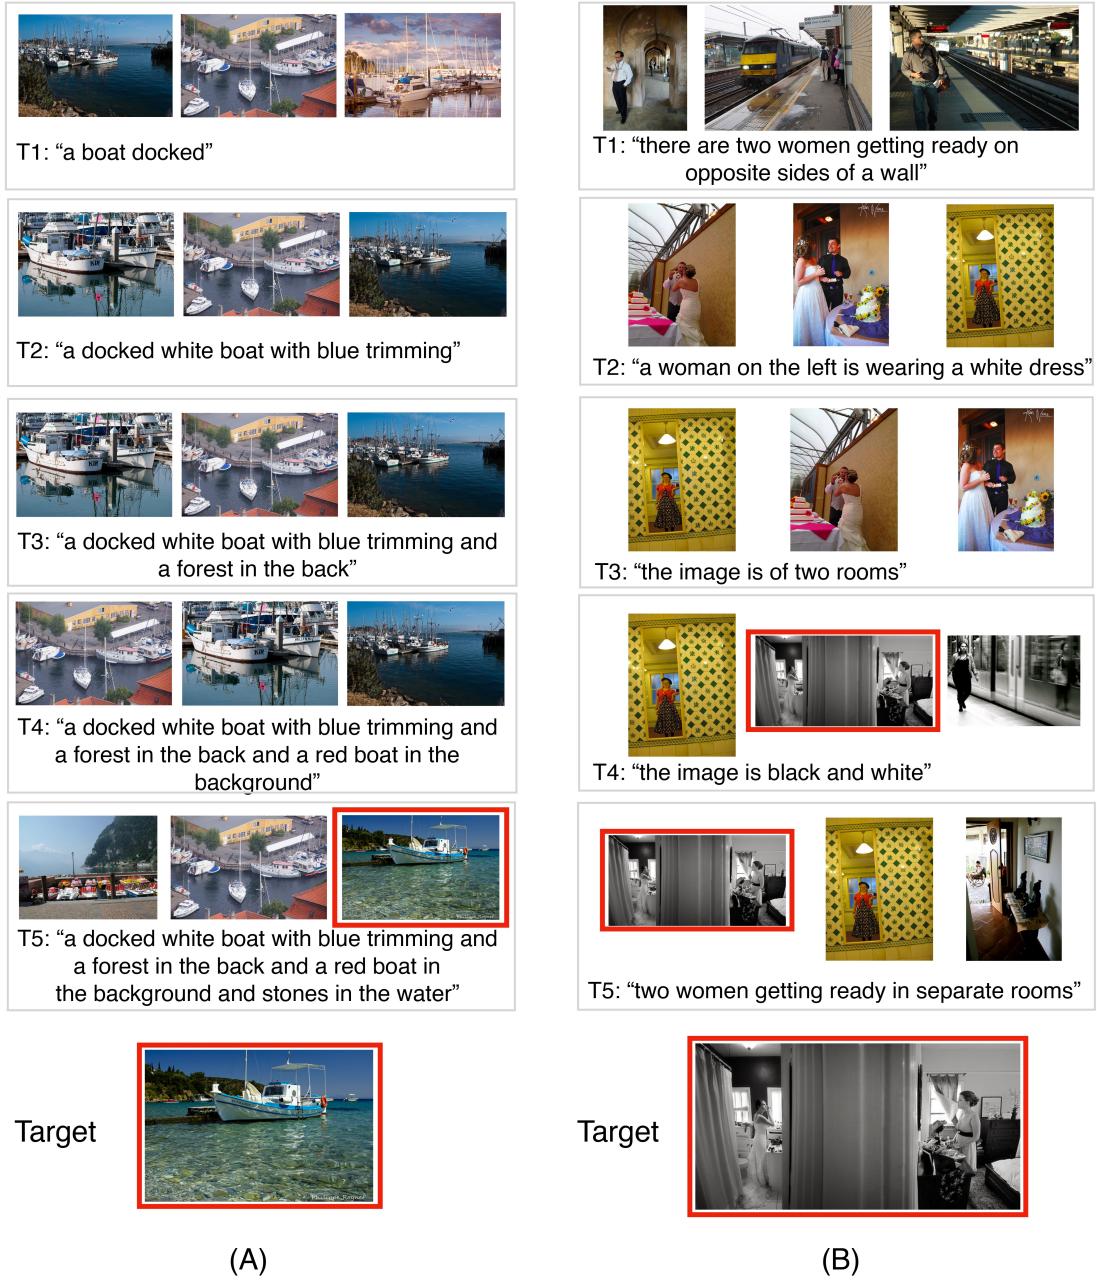

Figure 2: Examples of real user queries collected in the human subject study and the top-3 retrieved images from the Drill-down<sub>3×256</sub> model at each turn. The ranks of the target image (A) at each turn are 51, 24, 11, 7, 3. The ranks of the target image (B) at each turn are 182, 23, 7, 2, 1.

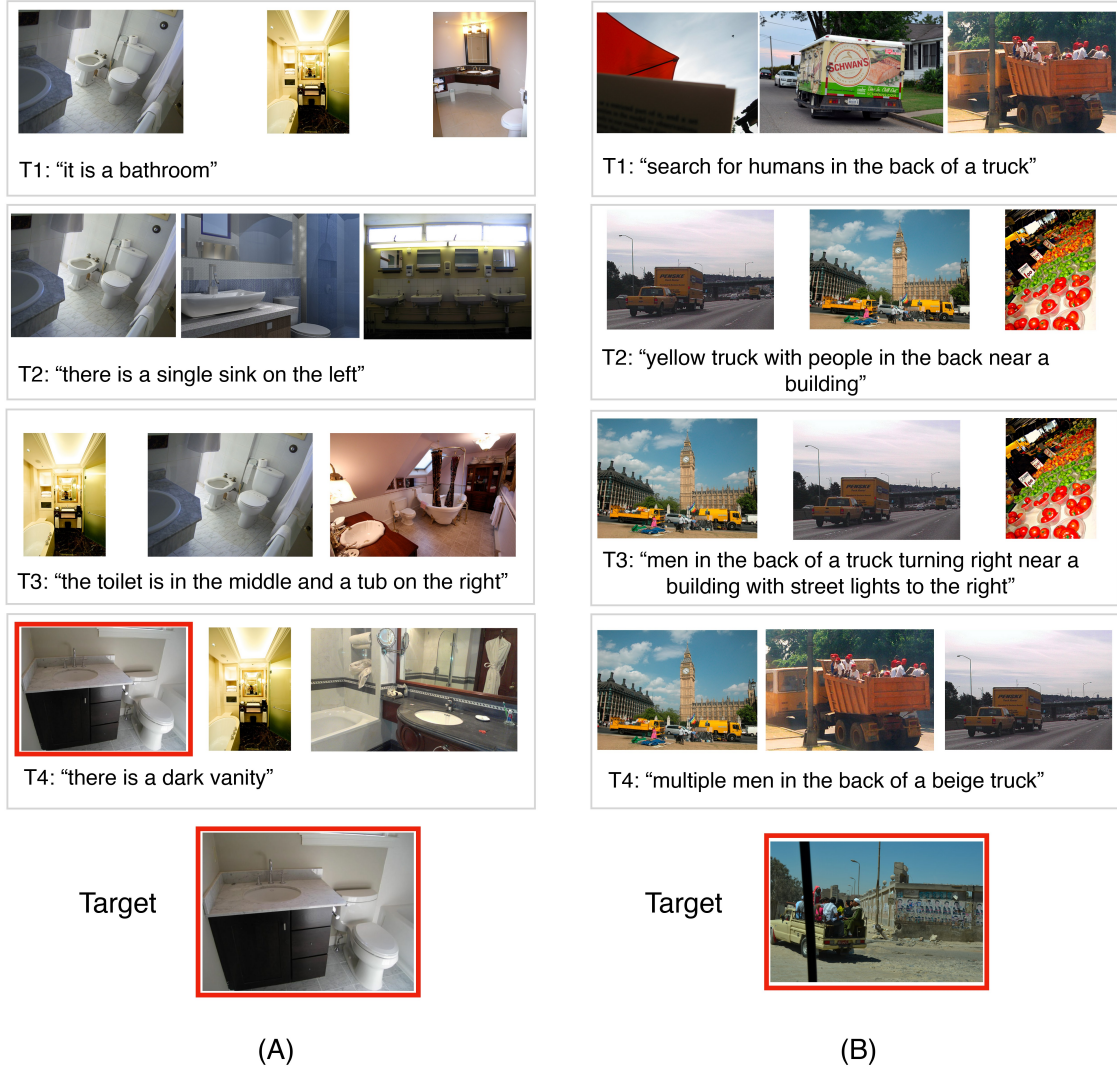

Figure 3: Examples of real user queries collected in the human subject study and the top-3 retrieved images from the Drill-down<sub>3×256</sub> model at each turn. The ranks of the target image (A) at each turn are 33, 10, 10, 1. The ranks of the target image (B) at each turn are 826, 62, 24, 4.
